# Supplementary material
Source: PubMed Central journal article supplement (PMC9349256)

Fold change relative to initial time  
B\*51:01:01 vs B\*07:02:01:01

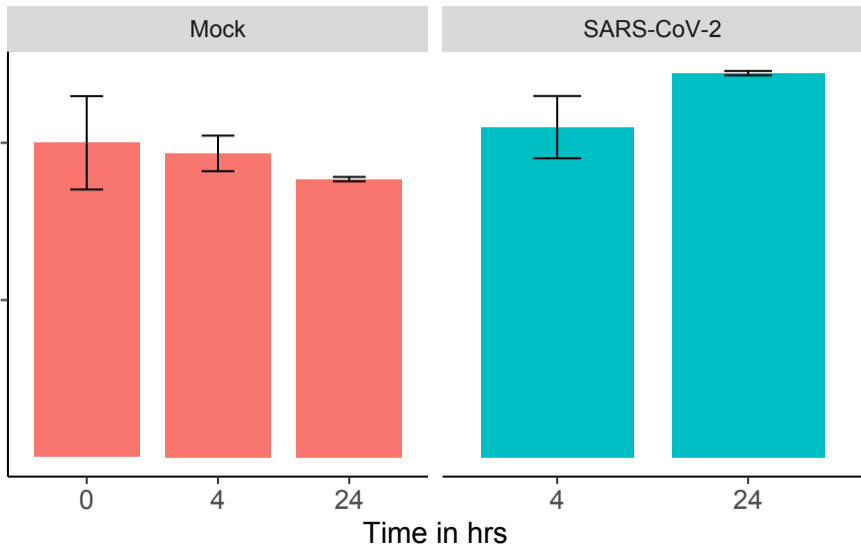

Supplement: 41431_2022_1070_MOESM2_ESM.pdf [file 41431_2022_1070_MOESM2_ESM.pdf]

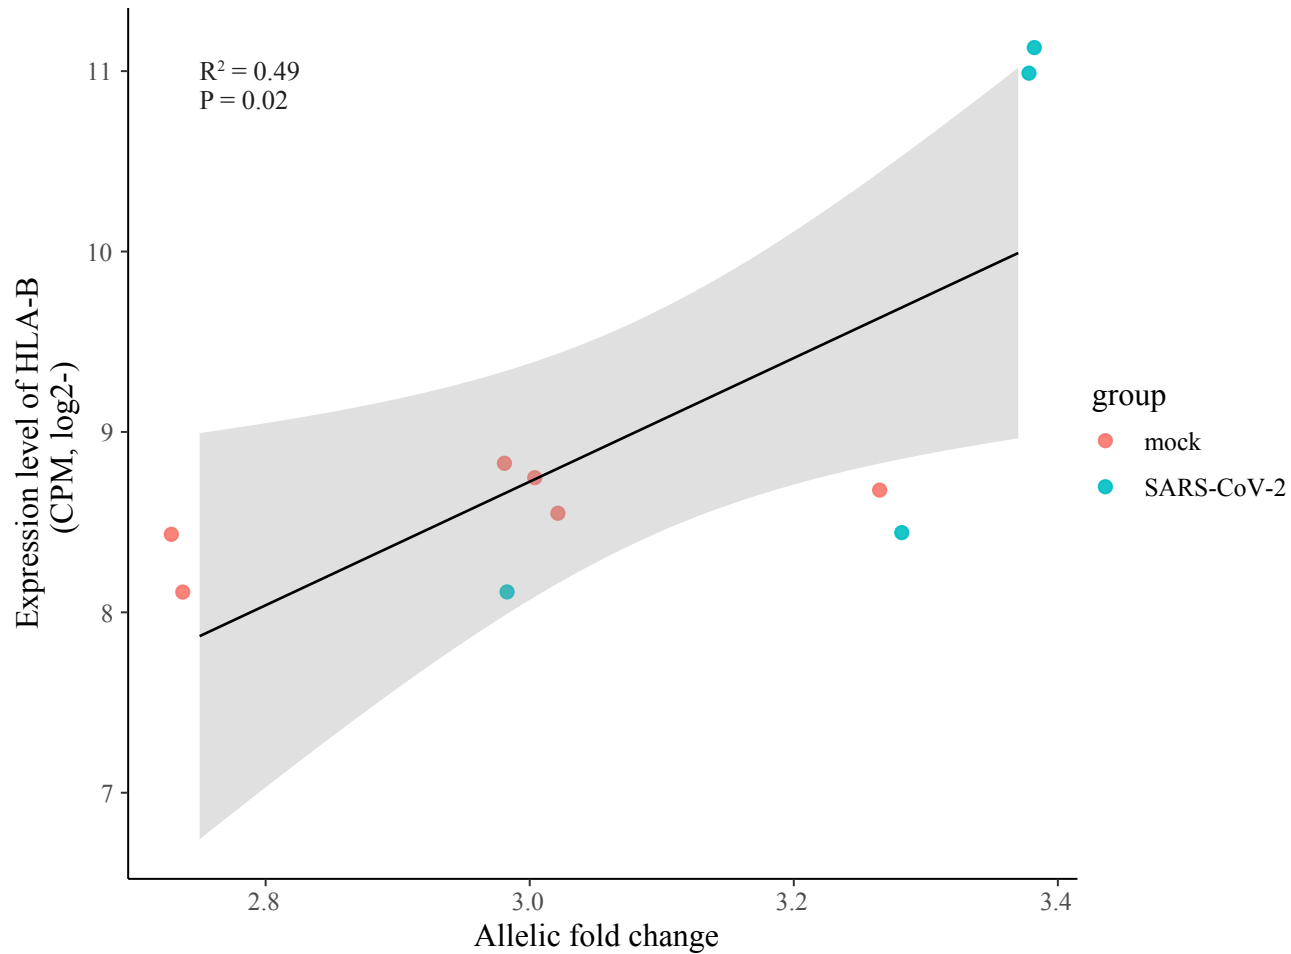

Supplement: 41431_2022_1070_MOESM3_ESM.pdf [file 41431_2022_1070_MOESM3_ESM.pdf]

Allelic FC  
HLA-B heterozygous alleles

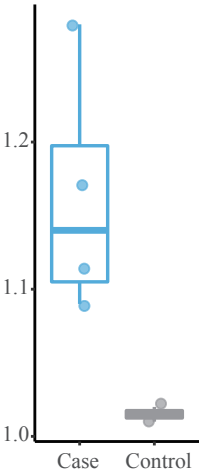

Supplement: 41431_2022_1070_MOESM4_ESM.pdf [file 41431_2022_1070_MOESM4_ESM.pdf]
